# Supplementary material for: Non-B, Non-C Hepatocellular Carcinoma in an HBV- and HCV-Endemic Area: A Community-Based Prospective Longitudinal Study
Source: MDPI journal article supplement (doi:10.3390/v14050984), 2022-05-07
Supplement: s1 [file s1]

Supplementary Table S1. Clinical characteristics of enrolled HBV participants.

| Variable                  | HCC<br>(n=72) | Non-HCC<br>(n=5601) | <i>p</i> -Value |
|---------------------------|---------------|---------------------|-----------------|
| Age (years)               | 59.8±9.9      | 55.0±9.5            | <0.001          |
| Sex                       |               |                     | <0.001          |
| Male                      | 53 (73.6%)    | 2609 (46.6%)        |                 |
| Female                    | 19 (26.4%)    | 2992 (53.4%)        |                 |
| BMI (kg/m <sup>2</sup> )  | 24.6±3.4      | 24.4±3.6            | 0.635           |
| <25                       | 41 (56.9%)    | 3405 (60.8%)        | 0.802           |
| 25-30                     | 26 (36.1%)    | 1843 (32.9%)        |                 |
| ≥30                       | 5 (6.9%)      | 353 (6.3%)          |                 |
| DM                        |               |                     | 0.943           |
| No                        | 58 (80.6%)    | 4493 (80.2%)        |                 |
| Yes                       | 14 (19.4%)    | 1108 (19.8%)        |                 |
| HTN                       |               |                     | 0.950           |
| No                        | 56 (77.8%)    | 4339 (77.5%)        |                 |
| Yes                       | 16 (22.2%)    | 1262 (22.5%)        |                 |
| GLU (mg/dL)               | 100.9±27.5    | 96.0±30.1           | 0.170           |
| BUN (mg/dL)               | 16.0±4.3      | 15.2±4.3            | 0.128           |
| CREA (mg/dL)              | 1.1±0.2       | 1.0±0.2             | 0.005           |
| MDRD-eGFR                 | 68.7±14.5     | 70.0±12.9           | 0.412           |
| Renal function stage      |               |                     | 0.108           |
| 1, 2                      | 51 (70.8%)    | 4406 (78.7%)        |                 |
| 3a, 3b, 4+                | 21 (29.2%)    | 1195 (21.3%)        |                 |
| UA (mg/dL)                | 5.8±1.2       | 5.7±1.5             | 0.269           |
| TCHOL (mg/dL)             | 186.5±37.3    | 202.1±35.9          | <0.001          |
| <240                      | 69 (95.8%)    | 4820 (86.1%)        | 0.017           |
| ≥240                      | 3 (4.2%)      | 781 (13.9%)         |                 |
| TG (mg/dL)                | 104.2±61.9    | 115.2±82.4          | 0.141           |
| <150                      | 61 (84.7%)    | 4467 (79.8%)        | 0.297           |
| ≥150                      | 11 (15.3%)    | 1134 (20.2%)        |                 |
| HDL-C (mg/dL)             | 61.0±19.2     | 58.3±14.8           | 0.250           |
| TCHOL/HDL                 | 3.3±1.0       | 3.6±1.0             | 0.002           |
| AFP (ng/mL)               | 214.0±1230.4  | 3.2±2.4             | 0.150           |
| <15                       | 62 (86.1%)    | 5581 (99.6%)        | <0.001          |
| ≥15                       | 10 (13.9%)    | 20 (0.4%)           |                 |
| AST (U/L)                 | 50.4±53.2     | 28.6±19.9           | <0.001          |
| ≤45                       | 54 (75.0%)    | 5227 (93.3%)        | <0.001          |
| >45                       | 18 (25.0%)    | 374 (6.7%)          |                 |
| ALT (U/L)                 | 47.2±46.9     | 31.0±35.2           | 0.005           |
| ≤45                       | 51 (70.8%)    | 4904 (87.6%)        | <0.001          |
| >45                       | 21 (29.2%)    | 697 (12.4%)         |                 |
| PLT (10 <sup>3</sup> /μL) | 160.2±56.5    | 214.2±57.3          | <0.001          |
| <150                      | 30 (41.7%)    | 613 (10.9%)         | <0.001          |
| ≥150                      | 42 (58.3%)    | 4988 (89.1%)        |                 |
| APRI <sup>†</sup>         | 0.97±1.18     | 0.37±0.34           | <0.001          |
| FIB4 <sup>‡</sup>         | 3.18±2.45     | 1.53±0.87           | <0.001          |

AFP: alpha fetoprotein; ALT: alanine aminotransferase; AST: aspartate aminotransferase; BMI: body mass index; BUN: blood urea nitrogen; CREA: creatinine; DM: diabetes mellitus; GLU: glucose; HDL-C: high-density lipoprotein cholesterol; HTN: hypertension; MDRD-eGFR: modification of diet in renal disease equation-estimated glomerular filtration rate; PLT: platelet; TCHOL: total cholesterol; TG: triglycerides; UA: uric acid.

<sup>†</sup>APRI = [(AST×100) / (PLT×40)]; <sup>‡</sup>FIB4 = [(Age×AST) / (PLT×(ALT)<sup>1/2</sup> )].

Supplementary Table S2. Clinical characteristics of enrolled HCV participants.

| Variable                 | HCC<br>(n=109) | Non-HCC<br>(n=2993) | p-Value |
|--------------------------|----------------|---------------------|---------|
| Age (years)              | 67.1±5.9       | 61.8±9.2            | <0.001  |
| Sex                      |                |                     | <0.001  |
| Male                     | 61 (56.0%)     | 1134 (37.9%)        |         |
| Female                   | 48 (44.0%)     | 1859 (62.1%)        |         |
| BMI (kg/m <sup>2</sup> ) | 24.4±4.0       | 24.5±3.6            | 0.825   |
| <25                      | 69 (63.3%)     | 1778 (59.4%)        | 0.221   |
| 25-30                    | 30 (27.5%)     | 1026 (34.3%)        |         |
| ≥30                      | 10 (9.2%)      | 189 (6.3%)          |         |
| DM                       |                |                     | 0.462   |
| No                       | 80 (73.4%)     | 2288 (76.4%)        |         |
| Yes                      | 29 (26.6%)     | 705 (23.6%)         |         |
| HTN                      |                |                     | 0.024   |
| No                       | 68 (62.4%)     | 2164 (72.3%)        |         |
| Yes                      | 41 (37.6%)     | 829 (27.7%)         |         |
| GLU (mg/dL)              | 104.2±40.2     | 99.8±33.1           | 0.257   |
| BUN (mg/dL)              | 17.7±6.6       | 16.5±5.0            | 0.046   |
| CREA (mg/dL)             | 1.2±0.3        | 1.1±0.3             | 0.002   |
| MDRD-eGFR                | 63.1±14.6      | 66.0±13.7           | 0.031   |
| Renal function stage     |                |                     | 0.061   |
| 1, 2                     | 62 (56.9%)     | 1963 (65.6%)        |         |
| 3a, 3b, 4+               | 47 (43.1%)     | 1030 (34.4%)        |         |
| UA (mg/dL)               | 6.3±1.8        | 5.8±1.5             | 0.004   |
| TCHOL (mg/dL)            | 175.3±36.7     | 193.2±37.9          | <0.001  |
| <240                     | 104 (95.4%)    | 2651 (88.6%)        | 0.026   |
| ≥240                     | 5 (4.6%)       | 342 (11.4%)         |         |
| TG (mg/dL)               | 105.7±61.0     | 109.4±70.4          | 0.588   |
| <150                     | 92 (84.4%)     | 2495 (83.4%)        | 0.774   |
| ≥150                     | 17 (15.6%)     | 498 (16.6%)         |         |
| HDL-C (mg/dL)            | 52.5±15.4      | 55.6±14.2           | 0.026   |
| TCHOL/HDL                | 3.5±1.1        | 3.6±0.9             | 0.377   |
| AFP (ng/mL)              | 18.4±65.0      | 3.9±4.2             | 0.022   |
| <15                      | 89 (81.7%)     | 2947 (98.5%)        | <0.001  |
| ≥15                      | 20 (18.3%)     | 46 (1.5%)           |         |

|                           |            |              |        |
|---------------------------|------------|--------------|--------|
| AST (U/L)                 | 78.8±52.1  | 41.1±48.4    | <0.001 |
| ≤45                       | 34 (31.2%) | 2297 (76.7%) | <0.001 |
| >45                       | 75 (68.8%) | 696 (23.3%)  |        |
| ALT (U/L)                 | 87.9±61.0  | 46.2±62.9    | <0.001 |
| ≤45                       | 30 (27.5%) | 2116 (70.7%) | <0.001 |
| >45                       | 79 (72.5%) | 877 (29.3%)  |        |
| PLT (10 <sup>3</sup> /μL) | 144.8±56.4 | 195.6±58.9   | <0.001 |
| <150                      | 66 (60.6%) | 636 (21.2%)  | <0.001 |
| ≥150                      | 43 (39.4%) | 2357 (78.8%) |        |
| APRI <sup>†</sup>         | 1.67±1.42  | 0.63±0.90    | <0.001 |
| FIB4 <sup>‡</sup>         | 4.67±2.99  | 2.24±1.54    | <0.001 |

AFP: alpha fetoprotein; ALT: alanine aminotransferase; AST: aspartate aminotransferase; BMI: body mass index; BUN: blood urea nitrogen; CREA: creatinine; DM: diabetes mellitus; GLU: glucose; HDL-C: high-density lipoprotein cholesterol; HTN: hypertension; MDRD-eGFR: modification of diet in renal disease equation-estimated glomerular filtration rate; PLT: platelet; TCHOL: total cholesterol; TG: triglycerides; UA: uric acid.

<sup>†</sup>APRI = [(AST×100) / (PLT×40)]; <sup>‡</sup>FIB4 = [(Age×AST) / (PLT×(ALT)<sup>1/2</sup>)].

Supplementary Table S3. Clinical characteristics of enrolled dual HBV and HCV participants.

| Variable                 | HCC<br>(n=12) | Non-HCC<br>(n=310) | <i>p</i> -Value |
|--------------------------|---------------|--------------------|-----------------|
| Age (years)              | 60.5±6.0      | 59.6±9.3           | 0.728           |
| Sex                      |               |                    | 0.005           |
| Male                     |               | 132 (42.6%)        |                 |
| Female                   | 12 (100.0%)   | 178 (57.4%)        |                 |
| BMI (kg/m <sup>2</sup> ) | 23.4±3.7      | 24.9±3.9           | 0.200           |
| <25                      | 8 (66.7%)     | 163 (52.6%)        | 0.738           |
| 25-30                    |               | 120 (38.7%)        |                 |
| ≥30                      | 4 (33.3%)     | 27 (8.7%)          |                 |
| DM                       |               |                    | 0.310           |
| No                       |               | 238 (76.8%)        |                 |
| Yes                      | 12 (100.0%)   | 72 (23.2%)         |                 |
| HTN                      |               |                    | 0.523           |
| No                       |               | 224 (72.3%)        |                 |
| Yes                      | 12 (100.0%)   | 86 (27.7%)         |                 |
| GLU (mg/dL)              | 106.3±37.7    | 99.2±33.3          | 0.472           |
| BUN (mg/dL)              | 15.9±3.6      | 16.5±5.5           | 0.682           |
| CREA (mg/dL)             | 1.1±0.3       | 1.1±0.3            | 0.395           |
| MDRD-eGFR                | 71.4±26.7     | 67.7±15.1          | 0.639           |
| Renal function stage     |               |                    | 0.196           |
| 1, 2                     | 7 (58.3%)     | 232 (74.8%)        |                 |
| 3a, 3b, 4+               | 5 (41.7%)     | 78 (25.2%)         |                 |

|                          |             |             |       |
|--------------------------|-------------|-------------|-------|
| UA (mg/dL)               | 6.7±2.3     | 5.8±1.6     | 0.222 |
| TCHOL (mg/dL)            | 204.0±50.8  | 196.5±37.0  | 0.500 |
| <240                     | 9 (75.0%)   | 269 (86.8%) | 0.217 |
| ≥240                     | 3 (25.0%)   | 41 (13.2%)  |       |
| TG (mg/dL)               | 160.3±161.8 | 111.1±69.9  | 0.317 |
| <150                     | 8 (66.7%)   | 254 (81.9%) | 0.247 |
| ≥150                     | 4 (33.3%)   | 56 (18.1%)  |       |
| HDL-C (mg/dL)            | 53.6±16.6   | 57.3±15.1   | 0.398 |
| TCHOL/HDL                | 4.0±1.3     | 3.6±1.0     | 0.126 |
| AFP (ng/mL)              | 37.6±71.7   | 4.5±13.5    | 0.139 |
| <15                      | 9 (75.0%)   | 301 (97.1%) | 0.007 |
| ≥15                      | 3 (25.0%)   | 9 (2.9%)    |       |
| AST (U/L)                | 61.8±46.0   | 40.8±30.1   | 0.146 |
| ≤45                      | 6 (50.0%)   | 244 (78.7%) | 0.03  |
| >45                      | 6 (50.0%)   | 66 (21.3%)  |       |
| ALT (U/L)                | 73.8±51.2   | 47.4±46.8   | 0.057 |
| ≤45                      | 4 (33.3%)   | 220 (71.0%) | 0.009 |
| >45                      | 8 (66.7%)   | 90 (29.0%)  |       |
| PLT 10 <sup>3</sup> /μL) | 174.9±65.8  | 192.8±56.6  | 0.287 |
| <150                     | 4 (33.3%)   | 70 (22.6%)  | 0.482 |
| ≥150                     | 8 (66.7%)   | 240 (77.4%) |       |
| APRI <sup>†</sup>        | 0.95±0.64   | 0.63±0.67   | 0.107 |
| FIB4 <sup>‡</sup>        | 2.74±1.53   | 2.11±1.28   | 0.099 |

AFP: alpha fetoprotein; ALT: alanine aminotransferase; AST: aspartate aminotransferase; BMI: body mass index; BUN: blood urea nitrogen; CREA: creatinine; DM: diabetes mellitus; GLU: glucose; HDL-C: high-density lipoprotein cholesterol; HTN: hypertension; MDRD-eGFR: modification of diet in renal disease equation-estimated glomerular filtration rate; PLT: platelet; TCHOL: total cholesterol; TG: triglycerides; UA: uric acid.

<sup>†</sup>APRI = [(AST×100) / (PLT×40)]; <sup>‡</sup>FIB4 = [(Age×AST) / (PLT×(ALT)<sup>1/2</sup> )].

Supplementary Table S4. Univariate and multivariate Cox proportional hazards model for predictors of HCC in HBV participants.

| Variable             | Univariable             |         | Multivariable <sup>§</sup> |         |
|----------------------|-------------------------|---------|----------------------------|---------|
|                      | HR (95% CI)             | p-value | HR (95% CI)                | p-Value |
| Age                  | 1.047 (1.022, 1.073)    | <0.001  |                            |         |
| Sex                  |                         |         |                            |         |
| Male vs. Female      | 3.200 (1.894, 5.406)    | <0.001  | 2.848 (1.628, 4.982)       | <0.001  |
| BMI                  |                         |         |                            |         |
| 25-30 vs. <25        | 1.190 (0.728, 1.945)    | 0.488   |                            |         |
| ≥30 vs. <25          | 1.232 (0.487, 3.117)    | 0.660   |                            |         |
| AST                  |                         |         |                            |         |
| >45 vs. ≤45          | 5.171 (3.029, 8.828)    | <0.001  |                            |         |
| ALT                  |                         |         |                            |         |
| >45 vs. ≤45          | 3.073 (1.847, 5.113)    | <0.001  |                            |         |
| BUN                  | 1.016 (0.965, 1.069)    | 0.543   |                            |         |
| CREA                 | 2.310 (1.150, 4.642)    | 0.019   |                            |         |
| Renal function stage |                         |         |                            |         |
| 3a, 3b, 4+ vs. 1, 2  | 1.196 (0.718, 1.993)    | 0.492   |                            |         |
| UA                   | 1.056 (0.912, 1.223)    | 0.466   |                            |         |
| TCHOL                |                         |         |                            |         |
| ≥240 vs. <240        | 0.266 (0.084, 0.846)    | 0.025   | 0.278 (0.086, 0.898)       | 0.032   |
| TG                   |                         |         |                            |         |
| ≥150 vs. <150        | 0.746 (0.393, 1.418)    | 0.372   |                            |         |
| HDL-C                | 1.011 (0.997, 1.026)    | 0.128   | 1.024 (1.009, 1.040)       | 0.002   |
| TCHOL/HDL            | 0.627 (0.471, 0.836)    | 0.001   |                            |         |
| AFP                  |                         |         |                            |         |
| ≥15 vs. <15          | 39.493 (20.175, 77.308) | <0.001  | 15.961 (7.890, 32.285)     | <0.001  |
| PLT                  |                         |         |                            |         |
| ≥150 vs. <150        | 5.358 (3.352, 8.564)    | <0.001  | 2.124 (1.225, 3.682)       | 0.007   |
| DM                   |                         |         |                            |         |
| Yes vs. No           | 0.888 (0.495, 1.592)    | 0.690   |                            |         |
| HTN                  |                         |         |                            |         |
| Yes vs. No           | 0.780 (0.447, 1.361)    | 0.382   |                            |         |
| APRI <sup>†</sup>    | 1.794 (1.613, 1.995)    | <0.001  |                            |         |
| FIB4 <sup>‡</sup>    | 1.347 (1.286, 1.411)    | <0.001  | 1.283 (1.197, 1.375)       | <0.001  |
| GLU                  | 1.004 (0.999, 1.008)    | 0.128   |                            |         |

AFP: alpha fetoprotein; ALT: alanine aminotransferase; AST: aspartate aminotransferase; BMI: body mass index; BUN: blood urea nitrogen; CREA: creatinine; DM: diabetes mellitus; GLU: glucose; HDL-C: high-density lipoprotein cholesterol; HTN: hypertension; MDRD-eGFR: modification of diet in renal disease equation-estimated glomerular filtration rate; PLT: platelet; TCHOL: total cholesterol; TG: triglycerides; UA: uric acid.

<sup>†</sup>APRI = [(AST×100) / (PLT×40)]; <sup>‡</sup>FIB4 = [(Age×AST) / (PLT×(ALT)<sup>1/2</sup> )].

<sup>§</sup>: Associated factors which showed *p*-values < 0.5 in univariable analysis were entered into stepwise multivariable analysis.

Supplementary Table S5. Univariate and multivariate Cox proportional hazards model for predictors of HCC in HCV participants.

| Variable             | Univariable            |                 | Multivariable <sup>§</sup> |                 |
|----------------------|------------------------|-----------------|----------------------------|-----------------|
|                      | HR (95% CI)            | <i>p</i> -Value | HR (95% CI)                | <i>p</i> -Value |
| Age                  | 1.076 (1.050, 1.103)   | <0.001          | 1.061 (1.033, 1.089)       | <0.001          |
| Sex                  |                        |                 |                            |                 |
| Male vs. Female      | 2.030 (1.390, 2.965)   | <0.001          | 1.756 (1.195, 2.581)       | 0.004           |
| BMI                  |                        |                 |                            |                 |
| 25-30 vs. <25        | 0.751 (0.489, 1.153)   | 0.190           |                            |                 |
| ≥30 vs. <25          | 1.582 (0.814, 3.073)   | 0.176           |                            |                 |
| AST                  |                        |                 |                            |                 |
| >45 vs. ≤45          | 6.795 (4.531, 10.190)  | <0.001          | 3.496 (2.222, 5.499)       | <0.001          |
| ALT                  |                        |                 |                            |                 |
| >45 vs. ≤45          | 5.897 (3.872, 8.980)   | <0.001          |                            |                 |
| BUN                  | 1.039 (1.006, 1.072)   | 0.020           |                            |                 |
| CREA                 | 1.680 (1.244, 2.269)   | <0.001          |                            |                 |
| Renal function stage |                        |                 |                            |                 |
| 3a, 3b, 4+ vs. 1, 2  | 1.276 (0.871, 1.868)   | 0.211           |                            |                 |
| UA                   | 1.254 (1.121, 1.403)   | <0.001          |                            |                 |
| TCHOL                |                        |                 |                            |                 |
| ≥240 vs. <240        | 0.350 (0.143, 0.858)   | 0.022           |                            |                 |
| TG                   |                        |                 |                            |                 |
| ≥150 vs. <150        | 0.996 (0.593, 1.671)   | 0.987           |                            |                 |
| HDL-C                | 0.985 (0.971, 0.999)   | 0.042           |                            |                 |
| TCHOL/HDL            | 0.869 (0.702, 1.076)   | 0.198           |                            |                 |
| AFP                  |                        |                 |                            |                 |
| ≥15 vs. <15          | 12.025 (7.397, 19.549) | <0.001          | 2.956 (1.746, 5.007)       | <0.001          |
| PLT                  |                        |                 |                            |                 |
| ≥150 vs. <150        | 5.561 (3.782, 8.176)   | <0.001          | 2.282 (1.471, 3.540)       | <0.001          |
| DM                   |                        |                 |                            |                 |
| Yes vs. No           | 1.121 (0.733, 1.715)   | 0.598           |                            |                 |
| HTN                  |                        |                 |                            |                 |
| Yes vs. No           | 1.384 (0.939, 2.040)   | 0.101           |                            |                 |
| APRI <sup>†</sup>    | 1.145 (1.106, 1.186)   | <0.001          |                            |                 |
| FIB4 <sup>‡</sup>    | 1.233 (1.198, 1.269)   | <0.001          | 1.101 (1.041, 1.164)       | <0.001          |
| GLU                  | 1.005 (1.000, 1.009)   | 0.031           | 1.005 (1.000, 1.009)       | 0.036           |

AFP: alpha fetoprotein; ALT: alanine aminotransferase; AST: aspartate aminotransferase; BMI: body mass index; BUN: blood urea nitrogen; CREA: creatinine; DM: diabetes mellitus; GLU: glucose; HDL-C: high-density lipoprotein cholesterol; HTN: hypertension; MDRD-eGFR: modification of diet in renal disease equation-estimated glomerular filtration rate; PLT: platelet; TCHOL: total cholesterol; TG: triglycerides; UA: uric acid.

<sup>†</sup>APRI = [(AST × 100) / (PLT × 40)]; <sup>‡</sup>FIB4 = [(Age × AST) / (PLT × (ALT)<sup>1/2</sup>)].

<sup>§</sup>: Associated factors which showed *p*-values < 0.5 in univariable analysis were entered into stepwise multivariable analysis.

Supplementary Table S6. Univariate and multivariate Cox proportional hazards model for predictors of HCC in dual HBV and HCV participants.

| Variable             | Univariable            |                 | Multivariable <sup>§</sup> |                 |
|----------------------|------------------------|-----------------|----------------------------|-----------------|
|                      | HR (95% CI)            | <i>p</i> -Value | HR (95% CI)                | <i>p</i> -Value |
| Age                  | 1.014 (0.951, 1.082)   | 0.670           |                            |                 |
| Sex                  |                        |                 |                            |                 |
| Male vs. Female      | 6.706 (1.469, 30.611)  | 0.014           | 5.813 (1.260, 26.810)      | 0.024           |
| BMI                  |                        |                 |                            |                 |
| 25-30 vs. <25        | 0.710 (0.214, 2.358)   | 0.576           |                            |                 |
| ≥30 vs. <25          | 0.000 (0.000, -)       | 0.994           |                            |                 |
| AST                  |                        |                 |                            |                 |
| >45 vs. ≤45          | 3.847 (1.240, 11.939)  | 0.020           |                            |                 |
| ALT                  |                        |                 |                            |                 |
| >45 vs. ≤45          | 5.114 (1.538, 17.002)  | 0.008           |                            |                 |
| BUN                  | 0.967 (0.856, 1.093)   | 0.590           |                            |                 |
| CREA                 | 1.612 (0.497, 5.226)   | 0.426           |                            |                 |
| Renal function stage |                        |                 |                            |                 |
| 3a, 3b, 4+ vs. 1, 2  | 1.804 (0.572, 5.695)   | 0.314           |                            |                 |
| UA                   | 1.301 (0.980, 1.729)   | 0.069           |                            |                 |
| TCHOL                |                        |                 |                            |                 |
| ≥240 vs. <240        | 2.163 (0.585, 7.988)   | 0.247           |                            |                 |
| TG                   |                        |                 |                            |                 |
| ≥150 vs. <150        | 2.153 (0.648, 7.153)   | 0.211           |                            |                 |
| HDL-C                | 0.982 (0.941, 1.025)   | 0.402           |                            |                 |
| TCHOL/HDL            | 1.491 (0.909, 2.447)   | 0.114           |                            |                 |
| AFP                  |                        |                 |                            |                 |
| ≥15 vs. <15          | 10.578 (2.850, 39.267) | <0.001          | 7.941 (2.119, 29.756)      | 0.002           |
| PLT                  |                        |                 |                            |                 |
| ≥150 vs. <150        | 1.568 (0.472, 5.208)   | 0.463           |                            |                 |
| DM                   |                        |                 |                            |                 |
| Yes vs. No           | 0.291 (0.038, 2.258)   | 0.238           |                            |                 |
| HTN                  |                        |                 |                            |                 |
| Yes vs. No           | 0.456 (0.100, 2.083)   | 0.311           |                            |                 |
| APRI <sup>†</sup>    | 1.497 (0.929, 2.412)   | 0.097           |                            |                 |
| FIB4 <sup>‡</sup>    | 1.344 (0.988, 1.830)   | 0.060           |                            |                 |
| GLU                  | 1.006 (0.994, 1.019)   | 0.304           |                            |                 |

AFP: alpha fetoprotein; ALT: alanine aminotransferase; AST: aspartate aminotransferase; BMI: body mass index; BUN: blood urea nitrogen; CREA: creatinine; DM: diabetes mellitus; GLU: glucose; HDL-C: high-density lipoprotein cholesterol; HTN: hypertension; MDRD-eGFR: modification of diet in renal disease equation-estimated glomerular filtration rate; PLT: platelet; TCHOL: total cholesterol; TG: triglycerides; UA: uric acid.

<sup>†</sup>APRI = [(AST × 100) / (PLT × 40)]; <sup>‡</sup>FIB4 = [(Age × AST) / (PLT × (ALT)<sup>1/2</sup> )].

<sup>§</sup>: Associated factors which showed *p*-values < 0.5 in univariable analysis were entered into stepwise multivariable analysis.
